# Supplementary material
Source: publisher figshare collection journal article supplement (https://geolsoc.figshare.com/ndownloader/files/27655720)
Supplement: Supplementary file 1 [file 27655720]

## Sheet: Precipice Sandstone F3
West Wandoan 1 Precipice Sandstone 1165.44 m
MineralVariety	Area%	Wt%
Quartz (Silica)	0.942	0.9475
Porosity	0.2081
Kaolinite (Halloysite, Dickite)	0.0375	0.0336
Illite	0.0043	0.0046
Na Montmorillonite	0.0037	0.0033
Muscovite	0.0019	0.0021
Illite/Smectite 60-40	0.0017	0.0015
Montmorillonite	0.0017	0.0014
Unclassified	0.0015	0
K-feldspar	0.0013	0.0013
Ca-Montmorillonite	0.0012	0.001
Albite	0.0011	0.0011
Beidellite	0.0009	0.0007
Illite/Smectite 70-30	0.0006	0.0005
Rutile/Anatase/Brookite	0.0005	0.0009
Zircon	0.0001	0.0002
Montmorillonite	0.0001	0.0001

## Sheet: Precipice Sandstone F10
West Wandoan 1 Precipice Sandstone 1207.61 m
Mineral	Area %	Wt %
Kaolinite	44.7228	45.6698
Quartz	33.6409	33.7051
Muscovite	15.3992	14.602
Albite	3.82967	3.88091
Kaol_RutileMix	1.13247	1.15646
Rutile	0.652464	0.402867
Orthoclase	0.304752	0.316068
Chlorite	0.126746	0.114074
Qtz_RutileMix	0.089909	0.090938
Zircon	0.071669	0.040921
Monazite	0.01046	0.005445
Gypsum	0.00604	0.006972
Sphalerite	0.005113	0.003394
Illmenite	0.002364	0.00133
Pyrite	0.001471	0.000781
Biotite	0.001213	0.001074
Chalcopyrite	0.001019	0.000644
FeOxide	0.000945	0.000477
Talc	0.000389	0.000376
Ankerite	0.000222	0.000197
Siderite	8e-05	5.4e-05
Micro CT Porosity reported as 8 % in Golab et al., (2015).

## Sheet: Evergreen Formation F10
Chinchilla 4 Evergreen Formation 1101.1 m							Calcite fracture		Calcite fracture		Calcite fracture		Adjacent rock matrix		Adjacent rock matrix		Adjacent rock matrix
MineralVariety	Area%	Wt%				MineralVariety	ROI 1 (Area%)	ROI 1 (Wt%)	ROI 2 (Area%)	ROI 2 (Wt%)	ROI 3 (Area%)	ROI 3 (Wt%)	ROI 4 (Area%)	ROI 4 (Wt%)	ROI 5 (Area%)	ROI 5 (Wt%)	ROI 6 (Area%)	ROI 6 (Wt%)
Quartz (Silica)	0.3925	0.4028				Calcite	0.9661	0.9757	0.9785	0.9884	0.979	0.9965	0	0	0	0	0	0
Albite	0.1712	0.1757				Quartz (Silica)	0.0149	0.0145	0	0	0.0018	0.0017	0.326	0.3356	0.3624	0.3769	0.1683	0.169
K-feldspar	0.1117	0.1129				Unclassified	0.0083	0	0.0098	0	0.0175	0	0.0098	0	0.0105	0	0.0038	0
Na Montmorillonite	0.0536	0.0493				Anorthite	0.0021	0.0021	0.0005	0.0005	0.0011	0.0011	0.0491	0.053	0.0199	0.0217	0.1729	0.1822
Calcite	0.0489	0.0519				Na Montmorillonite	0.0018	0.0015	0	0	0	0	0.0725	0.0669	0.0788	0.0735	0.0408	0.0367
Anorthite	0.0378	0.0407				Albite	0.0017	0.0017	0.0006	0.0006	0.0007	0.0007	0.2039	0.2098	0.1325	0.1378	0.4319	0.4336
Illite	0.0278	0.0302				Kaolinite (Halloysite, Dickite)	0.0017	0.0014	0	0	0	0	0.0148	0.0136	0.0088	0.0082	0.0005	0.0005
Chamosite	0.0245	0.0299				Porosity	0.0017		0.001		0.0017		0.0281		0.0184		0.0053
Montmorillonite	0.0224	0.0188				Ca-Montmorillonite	0.0011	0.0009	0	0	0	0	0.0234	0.0197	0.0242	0.0206	0.0095	0.0078
Porosity	0.0216					Montmorillonite	0.0009	0.0007	0	0	0	0	0.0323	0.0271	0.0471	0.04	0.0079	0.0065
Unclassified	0.0209	0				Beidellite	0.0007	0.0005	0	0	0	0	0.0264	0.0223	0.0741	0.0633	0.0083	0.0068
Beidellite	0.0192	0.0162				Nontronite	0.0005	0.0005	0	0	0	0	0.018	0.0189	0.0521	0.0554	0.0119	0.0122
Kaolinite (Halloysite, Dickite)	0.019	0.0174				K-feldspar	0.0003	0.0003	0.0086	0.0083	0	0	0.1513	0.1534	0.0771	0.079	0.1284	0.1269
Nontronite	0.015	0.0158				Chamosite	0	0	0.0009	0.001	0	0	0.0184	0.0226	0.0155	0.0192	0.0083	0.01
Ca-Montmorillonite	0.015	0.0126				Illite/Smectite 70-30	0	0	0	0	0	0	0.0066	0.0062	0.0041	0.0039	0	0
Grossular	0.0043	0.0066				Illite/Smectite 60-40	0	0	0	0	0	0	0.0061	0.0057	0.0018	0.0017	0	0
Pyrope	0.0032	0.0048				Illite	0	0	0	0	0	0	0.0375	0.041	0.0804	0.0887	0.0052	0.0055
Illite/Smectite 70-30	0.0028	0.0027				Clinochlore	0	0	0.0001	0.0001	0	0	0.0015	0.0017	0.0015	0.0017	0.0008	0.0008
Clinochlore	0.0022	0.0024				Montmorillonite (DHZ)	0	0	0	0	0	0	0.0025	0.0023	0.0093	0.0087	0.0017	0.0015
Illite/Smectite 60-40	0.0022	0.002				Pyrope	0	0	0	0	0	0	0	0	0	0	0	0
Montmorillonite (DHZ)	0.002	0.0018				Grossular	0	0	0	0	0	0	0	0	0	0	0	0
Apatite (F)	0.0011	0.0014				Zircon	0	0	0	0	0	0	0	0	0	0	0	0
Rutile/Anatase/Brookite	0.0008	0.0014				Siderite	0	0	0	0	0	0	0	0	0	0	0	0
Muscovite	0.0007	0.0008				Magnesite	0	0	0	0	0	0	0	0	0	0	0	0
Barite	0.0006	0.0011				Ankerite	0	0	0.001	0.0011	0	0	0	0	0	0	0	0
Zircon	0.0001	0.0002				Apatite (F)	0	0	0	0	0	0	0	0	0	0	0	0
Ankerite	0.0001	0.0001				Apatite (Cl)	0	0	0	0	0	0	0	0	0	0	0	0
Biotite	0.0001	0				Pyrite	0	0	0	0	0	0	0	0	0	0	0	0
Apatite (Cl)	0.0001	0.0001				Barite	0	0	0	0	0	0	0	0	0	0	0	0
Ilmenite	0.0001	0.0001				Muscovite	0	0	0	0	0	0	0	0	0	0	0	0
Pyrite	0	0.0001				Ilmenite	0	0	0	0	0	0	0	0	0	0	0	0
						Weathered Rutile-Ilmenite*	0	0	0	0	0	0	0	0	0	0	0	0
						Rutile/Anatase/Brookite	0	0	0	0	0	0	0.0001	0.0002	0	0	0	0

## Sheet: Westgrove Ironstone F11
Chinchilla 4 Westgrove Ironstone 1032.84 m								Calcite fracture		Adjacent to fracture		Rock matrix
MineralVariety	Area%	Wt%					MineralVariety	ROI 1 (Area%)	ROI 1 (Wt%)	ROI 2 (Area%)	ROI 2 (Wt%)	ROI 3 (Area%)	ROI 3 (Wt%)
Na Montmorillonite	0.2083	0.1997					Na Montmorillonite	0.0215	0.019	0.2122	0.2071	0.2338	0.2252
Quartz (Silica)	0.1802	0.1926					Beidellite	0.0112	0.0091	0.1134	0.1012	0.0918	0.0809
Beidellite	0.0899	0.0788					Quartz (Silica)	0.0184	0.0181	0.1091	0.1187	0.1615	0.1735
Albite	0.0752	0.0804					Ca-Montmorillonite*	0.0089	0.0071	0.0816	0.0725	0.0815	0.0715
Ca-Montmorillonite*	0.0742	0.0648					Kaolinite (Halloysite, Dickite)	0.0077	0.0067	0.0764	0.0743	0.0492	0.0471
K-feldspar	0.0693	0.0729					Illite	0.0105	0.0109	0.073	0.0843	0.0499	0.0569
Porosity	0.0532	note porosity is overestimated with the thin section edge					Albite	0.0128	0.0125	0.0577	0.0628	0.0708	0.076
Illite	0.049	0.0556					K-feldspar	0.0077	0.0075	0.0535	0.0573	0.0658	0.0695
Kaolinite (Halloysite, Dickite)	0.0489	0.0467					Illite/Smectite 60-40	0.0056	0.005	0.0524	0.0524	0.0245	0.0242
Nontronite	0.0409	0.0447					Montmorillonite	0.0077	0.0062	0.0519	0.0461	0.0406	0.0356
Montmorillonite	0.0389	0.034					Nontronite	0.0048	0.0048	0.0445	0.0495	0.0422	0.0464
Illite/Smectite 60-40	0.0246	0.0242					Illite/Smectite 70-30	0.003	0.0027	0.0328	0.0328	0.0188	0.0186
Siderite	0.0198	0.0307					Porosity	0.0047		0.0245		0.0244
Illite/Smectite 70-30	0.0183	0.0179					Unclassified	0.011	0	0.0104	0	0.0165	0
Unclassified	0.016	0					Anorthite	0.0045	0.0047	0.0103	0.0118	0.01	0.0113
Calcite	0.0154	0.0171					Siderite	0.0022	0.0031	0.0063	0.0099	0.0223	0.0347
Anorthite	0.0111	0.0124					Chamosite	0.0008	0.001	0.0047	0.0061	0.0081	0.0104
Chamosite	0.0076	0.0096					Montmorillonite (DHZ)*	0.0003	0.0003	0.004	0.0039	0.0046	0.0044
Montmorillonite (DHZ)*	0.0042	0.0041					Weathered Rutile-Ilmenite*	0.0003	0.0004	0.0023	0.0044	0.0043	0.0081
Weathered Rutile-Ilmenite*	0.0038	0.0071					Muscovite	0	0	0.0017	0.002	0.001	0.0012
Muscovite	0.0011	0.0013					Pyrope	0.001	0.0015	0.0009	0.0014	0.0008	0.0012
Rutile/Anatase/Brookite	0.0008	0.0015					Rutile/Anatase/Brookite	0.0001	0.0001	0.0004	0.0008	0.0007	0.0012
Pyrope	0.0008	0.0012					Grossular	0.0099	0.0146	0.0003	0.0005	0.0002	0.0003
Grossular	0.0006	0.001					Clinochlore	0	0	0.0001	0.0002	0.0003	0.0003
Clinochlore	0.0003	0.0003					Magnesite	0	0	0.0001	0.0001	0.0002	0.0002
Apatite (F)	0.0002	0.0003					Ankerite	0.0004	0.0005	0	0	0	0
Magnesite	0.0002	0.0002					Calcite	0.8496	0.8641	0	0	0.0001	0.0001
Ilmenite	0.0002	0.0003					Pyrite	0	0	0	0	0.0002	0.0003
Pyrite	0.0001	0.0003					Apatite (F)	0	0	0	0	0.0002	0.0002
Zircon	0.0001	0.0002					Ilmenite	0	0	0	0	0.0002	0.0004
Apatite (Cl)	0.0001	0.0001					Zircon	0	0	0	0	0.0001	0.0001
							Apatite (Cl)	0	0	0	0	0	0.0001

## Sheet: Westgrove Ironstone F15B
West Wandoan 1 Westgrove Ironstone 1017.1 m						Siderite cemented		Apatite area
MineralVariety	Area%	Wt%			MineralVariety	ROI 1 (Area%)	ROI 1 (Wt%)	ROI 2 (Area%)	ROI 2 (Wt%)
Apatite (F)	0.3438	0.3533			Siderite	0.8865	0.8901	0.0783	0.0973
Siderite	0.2656	0.3242			Weathered Rutile-Ilmenite*	0.0527	0.0641	0.002	0.0031
Levantite*	0.1023	0.0854			Chamosite	0.0262	0.0216	0.0012	0.0012
Unclassified	0.0719	0			Almandine	0.0091	0.0096	0.0011	0.0015
Unknown Secondary Phosphate 3*	0.0398	0.064			Unclassified	0.0082	0	0.0578	0
Quartz (Silica)	0.0197	0.0166			Magnesite	0.005	0.004	0.0006	0.0006
Anorthite	0.0179	0.0158			Pyrite	0.0034	0.0044	0.0001	0.0002
Albite	0.0173	0.0146			Porosity	0.0027		0.0059
K-feldspar	0.0128	0.0106			Kaolinite (Halloysite, Dickite)	0.0013	0.0008	0.0053	0.004
Almandine	0.0122	0.0157			Nontronite	0.0013	0.0009	0.0007	0.0006
Kaolinite (Halloysite, Dickite)	0.0121	0.0091			Quartz (Silica)	0.001	0.0007	0.0266	0.0228
Weathered Rutile-Ilmenite*	0.0121	0.0179			Illite	0.001	0.0008	0.0063	0.0057
Apatite (Cl)	0.0109	0.0111			Beidellite	0.001	0.0006	0.0022	0.0015
Illite	0.0108	0.0097			Pyrope	0.0007	0.0007	0.0003	0.0004
Pyrite	0.0077	0.0121			Ca-Montmorillonite*	0.0006	0.0003		0.0009
Montmorillonite	0.0067	0.0046			Na Montmorillonite	0.0005	0.0003	0.0013	0.001
Chamosite	0.0067	0.0068			Montmorillonite	0.0004	0.0002	0.004	0.0028
Unknown secondary Phosphate*	0.0053	0.0068			K-feldspar	0.0002	0.0001	0.0147	0.0124
Beidellite	0.0038	0.0027			Apatite (F)	0.0002	0.0001	0.5079	0.5315
Porosity	0.0037				Anorthite	0.0001	0.0001	0.0164	0.0148
Unknown Secondary Phosphate*	0.0033	0.0042			Albite	0.0001	0.0001	0.0172	0.0147
Na Montmorillonite	0.0029	0.0022			Illite/Smectite 60-40	0.0001	0.0001	0.0024	0.0019
Ca-Montmorillonite*	0.0028	0.0019			Annite	0.0001	0.0001	0.0001	0.0001
Illite/Smectite 60-40	0.0028	0.0021			Rutile/Anatase/Brookite	0.0001	0.0001	0.0002	0.0002
Nontronite	0.0026	0.0023			Illite/Smectite 70-30	0.0001	0	0.0013	0.001
Pyrope	0.0026	0.0032			Montmorillonite (DHZ)*	0	0	0	0
Magnesite	0.0016	0.0016			Levantite*	0	0	0.1516	0.1289
Illite/Smectite 70-30	0.0008	0.0006			Muscovite	0	0	0.0002	0.0002
Annite	0.0004	0.0004			Apatite (Cl)	0	0	0.0101	0.0106
Rutile/Anatase/Brookite	0.0002	0.0003			Unknown Secondary Phosphate*	0	0	0.0061	0.008
Muscovite	0.0002	0.0001			Unknown Secondary Phosphate 3*	0	0	0.0734	0.12
Montmorillonite (DHZ)*	0.0001	0.0001			Unknown secondary Phosphate*	0	0	0.0093	0.0121
Sphalerite	0.0001	0.0001			Gypsum/Anhydrite	0	0	0.0001	0.0001
